# Supplementary material
Source: PubMed Central journal article supplement (PMC9812902)

## Supplementary File

### Conditioning regimens are associated with distinct patterns of microbiota injury in allogeneic hematopoietic cell transplantation

#### Contents

|                                                                                                                                                                                 |           |
|---------------------------------------------------------------------------------------------------------------------------------------------------------------------------------|-----------|
| <b>Supplementary Methods</b> .....                                                                                                                                              | <b>2</b>  |
| Versions of tools .....                                                                                                                                                         | 2         |
| <b>Supplementary Tables</b> .....                                                                                                                                               | <b>4</b>  |
| Table S1. Population characteristics by conditioning regimen.....                                                                                                               | 4         |
| Table S2. Greater conditioning intensity is associated with reduction in log diversity in a Generalized Estimating Equations multivariable model .....                          | 7         |
| Table S3. A multivariable Generalized Estimating Equations model to evaluate the association between log diversity and conditioning intensity in an external multicenter cohort | 8         |
| Table S4. Conditioning regimens are associated with a differential reduction in log diversity in a Generalized Estimating Equations multivariable model .....                   | 9         |
| <b>Figures Captions</b> .....                                                                                                                                                   | <b>10</b> |
| Figure S1. Key population characteristics vary between conditioning regimens. ....                                                                                              | 10        |
| Figure S2. Distribution and $\alpha$ -diversity of stool sample over time from allogeneic hematopoietic cell transplantation.....                                               | 10        |
| Figure S3. Incidence of bacterial monodomination over time.....                                                                                                                 | 10        |
| Figure S4. Different modeling techniques demonstrate changes in similar taxa. ....                                                                                              | 10        |
| Figure S5. Multivariate analysis of taxonomic responses to conditioning.....                                                                                                    | 11        |
| Figure S6. Correlation matrix between patient, disease, and transplantation features.....                                                                                       | 11        |
| <b>References</b> .....                                                                                                                                                         | <b>12</b> |

# Supplementary Methods

## Versions of tools

MaAslin2 was modified to output model fit objects and to include interaction terms; the version of the tool used for this analysis can be found at <https://github.com/nickp60/Maaslin2> commit `6382ad6`. Ancom2 version 2.1 was used. Other tools and R packages used in this analysis are shown below:

```
sessionInfo()
```

```
R version 4.0.3 (2020-10-10)
```

```
Platform: x86_64-apple-darwin17.0 (64-bit)
```

```
Running under: macOS Big Sur 10.16
```

```
Matrix products: default
```

```
LAPACK: /Library/Frameworks/R.framework/Versions/4.0/Resources/lib/libRlapack.dylib
```

```
locale:
```

```
[1] en_US.UTF-8/en_US.UTF-8/en_US.UTF-8/C/en_US.UTF-8/en_US.UTF-8
```

```
attached base packages:
```

```
[1] parallel stats graphics grDevices datasets utils methods base
```

```
other attached packages:
```

```
[1] labdsv_2.0-1 mgcv_1.8-38 nlme_3.1-153 ggrepel_0.9.1 Rtsne_0.15 data.table_1.14.2
```

```
ggupset_0.3.0
```

```
[8] corncob_0.2.0 ANCOMBC_1.0.5 metagenomeSeq_1.32.0 RColorBrewer_1.1-2 glmnet_4.1-2
```

```
Matrix_1.3-4 limma_3.46.0
```

```
[15] Biobase_2.50.0 BiocGenerics_0.36.1 ggtree_3.3.1 ggtext_0.1.1 phyloseq_1.34.0
```

```
Maaslin2_1.7.2 lubridate_1.7.10
```

```
[22] patchwork_1.1.1 forcats_0.5.1 stringr_1.4.0 dplyr_1.0.7 purrr_0.3.4 readr_2.0.2
```

```
tidyr_1.1.4
```

```
[29] tibble_3.1.6 ggplot2_3.3.5 tidyverse_1.3.1
```

```
loaded via a namespace (and not attached):
```

```
[1] ggvenn_0.1.9 utf8_1.2.2 tidymodels_1.1.1 htmlwidgets_1.5.4 grid_4.0.3 pROC_1.17.0.1  
munsell_0.5.0
```

```
[8] codetools_0.2-18 withr_2.4.3 colorspace_2.0-2 highr_0.9 knitr_1.36 rstudioapi_0.13  
stats4_4.0.3
```

```
[15] robustbase_0.93-9 ggsignif_0.6.3 labeling_0.4.2 Rdpack_2.1.2 optparse_1.7.1
```

```
lpsymphony_1.18.0 farver_2.1.0
```

```
[22] rhdf5_2.34.0 vctrs_0.3.8 treeio_1.19.1 generics_0.1.1 ipred_0.9-11 xfun_0.26
```

```
markdown_1.1
```

```
[29] R6_2.5.1 locfit_1.5-9.4 bitops_1.0-7 rhdf5filters_1.2.1 microbiome_1.12.0 gridGraphics_0.5-1
```

```
assertthat_0.2.1
```

```
[36] scales_1.1.1 nnet_7.3-16 gtable_0.3.0 timeDate_3043.102 rlang_0.4.12 splines_4.0.3
```

```
rstatix_0.7.0
```

```
[43] lazyeval_0.2.2 ModelMetrics_1.2.2.2 broom_0.7.9 checkmate_2.0.0 BiocManager_1.30.15
```

```
yaml_2.2.1 reshape2_1.4.4
```

```
[50] abind_1.4-5 modelr_0.1.8 backports_1.2.1 Hmisc_4.5-0 caret_6.0-88 gridtext_0.1.4
```

```
lava_1.6.9
```

```
[57] tools_4.0.3 bookdown_0.23 ggplotify_0.1.0 ellipsis_0.3.2 gplots_3.1.1 biomformat_1.18.0
```

```
Rcpp_1.0.7
```

```
[64] plyr_1.8.6 base64enc_0.1-3 zlibbioc_1.36.0 ggpubr_0.4.0 rpart_4.1-15 Wrench_1.8.0
```

```
S4Vectors_0.28.1
```

[71] haven\_2.4.3 cluster\_2.1.2 fs\_1.5.0 tinytex\_0.32 magrittr\_2.0.1 openxlsx\_4.2.4  
 reprex\_2.0.0  
 [78] mvtnorm\_1.1-3 matrixStats\_0.61.0 hms\_1.1.1 evaluate\_0.14 rio\_0.5.27 jpeg\_0.1-9  
 readxl\_1.3.1  
 [85] IRanges\_2.24.1 gridExtra\_2.3 shape\_1.4.6 compiler\_4.0.3 KernSmooth\_2.23-20  
 crayon\_1.4.2 htmltools\_0.5.1.1  
 [92] ggfun\_0.0.4 pcaPP\_1.9-74 tzdb\_0.1.2 Formula\_1.2-4 aplot\_0.1.1 DBI\_1.1.1  
 biglm\_0.9-2.1  
 [99] dbplyr\_2.1.1 MASS\_7.3-54 ade4\_1.7-17 getopt\_1.20.3 car\_3.0-11 permute\_0.9-5  
 cli\_3.1.0  
 [106] rbibutils\_2.2.2 gower\_0.2.2 igraph\_1.2.6 pkgconfig\_2.0.3 foreign\_0.8-81 recipes\_0.1.16  
 xml2\_1.3.2  
 [113] foreach\_1.5.1 multtest\_2.46.0 XVector\_0.30.0 proclim\_2019.11.13 rvest\_1.0.0  
 yulab.utils\_0.0.4 digest\_0.6.29  
 [120] vegan\_2.5-7 Biostrings\_2.58.0 rmarkdown\_2.10 cellranger\_1.1.0 tidytree\_0.3.6  
 htmlTable\_2.2.1 curl\_4.3.2  
 [127] gtools\_3.9.2 nloptr\_1.2.2.2 lifecycle\_1.0.1 jsonlite\_1.7.2 Rhdf5lib\_1.12.1 carData\_3.0-4  
 fansi\_0.5.0  
 [134] pillar\_1.6.4 lattice\_0.20-45 httr\_1.4.2 DEoptimR\_1.0-9 survival\_3.2-13 glue\_1.6.0  
 zip\_2.2.0  
 [141] png\_0.1-7 iterators\_1.0.13 class\_7.3-19 stringi\_1.7.5 latticeExtra\_0.6-29 caTools\_1.18.2  
 renv\_0.13.2  
 [148] ape\_5.6

## Supplementary Tables

**Table S1. Population characteristics by conditioning regimen**

|                         |                         | Bu4/Mel/<br>Flu         | Flu/Mel                 | Flu/Cy/Tt<br>/TBI400    | TBI1375/<br>Tt/Cy       | Flu/Bu4                 | Flu/Cy/T<br>BI200       | Mel/T/Flu               | Clo/Tt/Mel              |
|-------------------------|-------------------------|-------------------------|-------------------------|-------------------------|-------------------------|-------------------------|-------------------------|-------------------------|-------------------------|
| n                       |                         | 359                     | 233                     | 190                     | 130                     | 87                      | 107                     | 42                      | 40                      |
| Sex (%)                 | Male                    | 215<br>(59.9)           | 148<br>(63.5)           | 106<br>(55.8)           | 66 (50.8)               | 52 (59.8)               | 77 (72.0)               | 27 (64.3)               | 24 (60.0)               |
|                         | Female                  | 144<br>(40.1)           | 85 (36.5)               | 84 (44.2)               | 64 (49.2)               | 35 (40.2)               | 30 (28.0)               | 15 (35.7)               | 16 (40.0)               |
| Age (median [IQR])      |                         | 60 [52,<br>65]          | 62 [53,<br>68]          | 50 [40,<br>56]          | 41 [32,<br>50]          | 64 [56,<br>68]          | 58 [51,<br>66]          | 62 [51,<br>66]          | 53 [44,<br>61]          |
| Disease (%)             | AML                     | 125<br>(34.8)           | 79 (33.9)               | 82 (43.2)               | 62 (47.7)               | 47 (54.0)               | 0 (0.0)                 | 9 (21.4)                | 14 (35.0)               |
|                         | MDS/MPN                 | 128<br>(35.7)           | 61 (26.2)               | 16 (8.4)                | 20 (15.4)               | 35 (40.2)               | 0 (0.0)                 | 23 (54.8)               | 3 (7.5)                 |
|                         | Lymphoma/CLL            | 0 (0.0)                 | 57 (24.5)               | 56 (29.5)               | 9 (6.9)                 | 0 (0.0)                 | 100<br>(93.5)           | 9 (21.4)                | 0 (0.0)                 |
|                         | ALL                     | 1 (0.3)                 | 20 (8.6)                | 28 (14.7)               | 36 (27.7)               | 4 (4.6)                 | 2 (1.9)                 | 0 (0.0)                 | 19 (47.5)               |
|                         | Plasma cell neoplasm    | 99 (27.6)               | 11 (4.7)                | 0 (0.0)                 | 0 (0.0)                 | 0 (0.0)                 | 0 (0.0)                 | 1 (2.4)                 | 0 (0.0)                 |
|                         | Other leukemias         | 1 (0.3)                 | 4 (1.7)                 | 6 (3.2)                 | 3 (2.3)                 | 1 (1.1)                 | 3 (2.8)                 | 0 (0.0)                 | 4 (10.0)                |
|                         | Non-malignant disorders | 5 (1.4)                 | 1 (0.4)                 | 2 (1.1)                 | 0 (0.0)                 | 0 (0.0)                 | 2 (1.9)                 | 0 (0.0)                 | 0 (0.0)                 |
| Previous Allo-HCT (%)   | 1st allo-HCT            | 354<br>(98.6)           | 212<br>(91.0)           | 187<br>(98.4)           | 130<br>(100.0)          | 82 (94.3)               | 107<br>(100.0)          | 39 (92.9)               | 30 (75.0)               |
|                         | 2nd allo-HCT            | 5 (1.4)                 | 21 (9.0)                | 3 (1.6)                 | 0 (0.0)                 | 5 (5.7)                 | 0 (0.0)                 | 3 (7.1)                 | 10 (25.0)               |
| HCT-CI (median [IQR])   |                         | 2 [1, 4]                | 4 [2, 5]                | 2 [1, 3]                | 2 [1, 3]                | 3 [2, 4]                | 2 [0, 3]                | 3 [1, 5]                | 3 [2, 4]                |
| HCT year (median [IQR]) |                         | 2014<br>[2012,<br>2016] | 2016<br>[2014,<br>2017] | 2015<br>[2013,<br>2016] | 2014<br>[2012,<br>2016] | 2016<br>[2015,<br>2017] | 2013<br>[2011,<br>2017] | 2017<br>[2017,<br>2018] | 2012<br>[2011,<br>2017] |
| Donor type (%)          | Matched unrelated       | 185<br>(51.5)           | 144<br>(61.8)           | 21 (11.1)               | 57 (43.8)               | 53 (60.9)               | 51 (47.7)               | 1 (2.4)                 | 22 (55.0)               |

|                                           |                               |             |             |             |             |            |             |            |            |
|-------------------------------------------|-------------------------------|-------------|-------------|-------------|-------------|------------|-------------|------------|------------|
|                                           | Matched related               | 102 (28.4)  | 59 (25.3)   | 12 (6.3)    | 63 (48.5)   | 27 (31.0)  | 36 (33.6)   | 0 (0.0)    | 8 (20.0)   |
|                                           | Cord blood                    | 0 (0.0)     | 3 (1.3)     | 156 (82.1)  | 1 (0.8)     | 0 (0.0)    | 11 (10.3)   | 1 (2.4)    | 2 (5.0)    |
|                                           | Mismatched non-haploidentical | 72 (20.1)   | 21 (9.0)    | 1 (0.5)     | 9 (6.9)     | 6 (6.9)    | 9 (8.4)     | 2 (4.8)    | 8 (20.0)   |
|                                           | Haploidentical                | 0 (0.0)     | 6 (2.6)     | 0 (0.0)     | 0 (0.0)     | 1 (1.1)    | 0 (0.0)     | 38 (90.5)  | 0 (0.0)    |
| Graft source (%)                          | PBSC T-cell depleted          | 359 (100.0) | 0 (0.0)     | 0 (0.0)     | 117 (90.0)  | 0 (0.0)    | 0 (0.0)     | 0 (0.0)    | 22 (55.0)  |
|                                           | PBSC unmodified               | 0 (0.0)     | 199 (85.4)  | 34 (17.9)   | 10 (7.7)    | 63 (72.4)  | 94 (87.9)   | 15 (35.7)  | 13 (32.5)  |
|                                           | Cord blood                    | 0 (0.0)     | 3 (1.3)     | 156 (82.1)  | 1 (0.8)     | 0 (0.0)    | 11 (10.3)   | 1 (2.4)    | 2 (5.0)    |
|                                           | BM unmodified                 | 0 (0.0)     | 31 (13.3)   | 0 (0.0)     | 2 (1.5)     | 24 (27.6)  | 2 (1.9)     | 26 (61.9)  | 3 (7.5)    |
| Conditioning intensity (%)                | Ablative                      | 359 (100.0) | 0 (0.0)     | 190 (100.0) | 130 (100.0) | 87 (100.0) | 0 (0.0)     | 0 (0.0)    | 40 (100.0) |
|                                           | Reduced Intensity             | 0 (0.0)     | 233 (100.0) | 0 (0.0)     | 0 (0.0)     | 0 (0.0)    | 0 (0.0)     | 42 (100.0) | 0 (0.0)    |
|                                           | Nonmyeloablative              | 0 (0.0)     | 0 (0.0)     | 0 (0.0)     | 0 (0.0)     | 0 (0.0)    | 107 (100.0) | 0 (0.0)    | 0 (0.0)    |
| GVHD prophylaxis (%)                      | none                          | 359 (100.0) | 0 (0.0)     | 0 (0.0)     | 117 (90.0)  | 0 (0.0)    | 0 (0.0)     | 0 (0.0)    | 22 (55.0)  |
|                                           | MTX-based                     | 0 (0.0)     | 188 (80.7)  | 35 (18.4)   | 12 (9.2)    | 79 (90.8)  | 95 (88.8)   | 1 (2.4)    | 16 (40.0)  |
|                                           | MMF-based                     | 0 (0.0)     | 14 (6.0)    | 155 (81.6)  | 1 (0.8)     | 1 (1.1)    | 12 (11.2)   | 1 (2.4)    | 2 (5.0)    |
|                                           | PTCy-based                    | 0 (0.0)     | 31 (13.3)   | 0 (0.0)     | 0 (0.0)     | 7 (8.0)    | 0 (0.0)     | 40 (95.2)  | 0 (0.0)    |
| Exposure to antibiotics* up to day 21 (%) | Exposed                       | 286 (79.7)  | 117 (50.2)  | 139 (73.2)  | 107 (82.3)  | 41 (47.1)  | 56 (52.3)   | 31 (73.8)  | 27 (67.5)  |
|                                           | Not exposed                   | 73 (20.3)   | 116 (49.8)  | 51 (26.8)   | 23 (17.7)   | 46 (52.9)  | 51 (47.7)   | 11 (26.2)  | 13 (32.5)  |

\* The frequency of antibiotic exposure considered any exposure to drugs commonly used in this cohort of treatment of neutropenic fever or for *C. difficile* diarrhea (oral vancomycin, imipenem-cilastatin, meropenem, piperacillin-tazobactam, clindamycin, and metronidazole) between the first days of conditioning and days 21 post-allo-HCT.

IQR - interquartile range; AML – acute myeloid leukemia; MDS – myelodysplastic syndrome; MPN – myeloproliferative neoplasm; CLL – chronic lymphocytic leukemia; ALL – acute lymphoblastic leukemia; Allo-HCT – allogeneic hematopoietic cell transplantation; HCT-CI - hematopoietic cell transplantation-specific comorbidity index; MTX – methotrexate; MMF – mycophenolate mofetil; PTCy – post-transplantation cyclophosphamide.

**Table S2. Greater conditioning intensity is associated with reduction in log diversity in a Generalized Estimating Equations multivariable model**

| Characteristic                                 | Beta  | 95% CI       | p-value |
|------------------------------------------------|-------|--------------|---------|
| Days from allo-HCT to sample collection*s      |       |              |         |
| Spline (level 1)                               | -1.4  | -1.9, -0.82  | <0.001  |
| Spline (level 2)                               | -3.3  | -3.6, -3.0   | <0.001  |
| Spline (level 3)                               | -1.6  | -2.0, -1.2   | <0.001  |
| Conditioning intensity                         |       |              |         |
| Ablative                                       | —     | —            |         |
| Non-ablative                                   | 0.42  | 0.31, 0.53   | <0.001  |
| Reduced Intensity                              | 0.15  | 0.07, 0.22   | <0.001  |
| Age                                            | 0     | 0.00, 0.01   | <0.001  |
| Sex                                            |       |              |         |
| Female                                         | —     | —            |         |
| Male                                           | 0.05  | -0.01, 0.11  | 0.074   |
| Sample exposed to GVHD prophylaxis             |       |              |         |
| Not-exposed                                    | —     | —            |         |
| Exposed                                        | -0.1  | -0.18, -0.03 | 0.007   |
| Sample exposed to non-prophylactic antibiotics |       |              |         |
| Not-exposed                                    |       |              |         |
| Exposed                                        | -0.25 | -0.31, -0.19 | <0.001  |
| Sample exposed to conditioning                 |       |              |         |
| Not-exposed                                    |       |              |         |
| Exposed                                        | 0.04  | -0.03, 0.12  | 0.3     |

\* The timeframe considered was from day -20 to day +30 relative to allo-HCT.

Allo-HCT – allogeneic hematopoietic cell transplantation; GVHD – graft-versus-host disease

**Table S3. A multivariable Generalized Estimating Equations model to evaluate the association between log diversity and conditioning intensity in an external multicenter cohort**

| Characteristic                            | Beta  | 95% CI      | p-value |
|-------------------------------------------|-------|-------------|---------|
| Days from allo-HCT to sample collection*s |       |             |         |
| Spline (level 1)                          | -0.78 | -1.5, -0.09 | 0.026   |
| Spline (level 2)                          | -0.55 | -1.2, 0.07  | 0.084   |
| Spline (level 3)                          | -0.38 | -0.88, 0.11 | 0.13    |
| Conditioning intensity                    |       |             |         |
| Ablative                                  | —     | —           |         |
| Non-ablative                              | 0.45  | 0.15, 0.77  | 0.005   |
| Reduced Intensity                         | 0.06  | -0.17, 0.26 | 0.6     |
| Age                                       | -0.01 | -0.01, 0.00 | 0.13    |
| Sex                                       |       |             |         |
| Female                                    | —     | —           |         |
| Male                                      | -0.02 | -0.21, 0.16 | 0.8     |



**Table S4. Conditioning regimens are associated with a differential reduction in log diversity in a Generalized Estimating Equations multivariable model**

| Characteristic                                | Beta  | 95% CI       | p-value |
|-----------------------------------------------|-------|--------------|---------|
| Days from allo-HCT to sample collection*      |       |              |         |
| Spline (level 1)                              | -1.4  | -1.9, -0.83  | <0.001  |
| Spline (level 2)                              | -3.3  | -3.6, -3.1   | <0.001  |
| Spline (level 3)                              | -1.6  | -2.0, -1.2   | <0.001  |
| Conditioning intensity                        |       |              |         |
| TBI1375/Tt/Cy                                 | —     | —            |         |
| Bu4/Mel/Flu                                   | 0.08  | -0.03, 0.19  | 0.2     |
| Clo/Tt/Mel                                    | -0.11 | -0.27, 0.06  | 0.2     |
| Flu/Bu4                                       | 0.23  | 0.09, 0.38   | 0.001   |
| Flu/Cy/TBI200                                 | 0.52  | 0.38, 0.66   | <0.001  |
| Flu/Cy/Tt/TBI400                              | 0.09  | -0.03, 0.20  | 0.14    |
| Flu/Mel                                       | 0.25  | 0.13, 0.37   | <0.001  |
| Mel/Tt/Flu                                    | 0.22  | 0.05, 0.40   | 0.01    |
| Age                                           | 0     | 0.00, 0.01   | <0.001  |
| Sex                                           |       |              |         |
| Female                                        | —     | —            |         |
| Male                                          | 0.05  | -0.01, 0.11  | 0.076   |
| Sample exposed to GVHD prophylaxis            |       |              |         |
| Not-exposed                                   | —     | —            |         |
| Exposed                                       | -0.1  | -0.17, -0.03 | 0.008   |
| Sample exposed to non-prophylactic antibiotic |       |              |         |
| Not-exposed                                   |       |              |         |
| Exposed                                       | -0.25 | -0.31, -0.19 | <0.001  |
| Sample exposed to conditioning                |       |              |         |
| Not-exposed                                   |       |              |         |
| Exposed                                       | 0.04  | -0.04, 0.12  | 0.3     |

\* The timeframe considered was from day -20 to day +30 relative to allo-HCT.

Allo-HCT – allogeneic hematopoietic cell transplantation; GVHD – graft-versus-host disease

## Figures Captions

**Figure S1. Key population characteristics vary between conditioning regimens.** Recipients of different conditioning regimens were enriched for transplant characteristics with respect to disease, graft source, GVHD prophylaxis, and frequency of exposure to antibiotics (right panel). For example, cord-blood recipients typically received Flu/Cy/Tt10/TBI400 and mycophenolate mofetil-based GVHD prophylaxis. For example, the Bu4/Mel/Flu regimen was almost exclusively administered with peripheral blood CD34-selected grafts without additional GVHD prophylaxis. The frequency of antibiotic exposure considered any exposure to drugs commonly used in this cohort of treatment of neutropenic fever or for *C. difficile* diarrhea (oral vancomycin, imipenem-cilastatin, meropenem, piperacillin-tazobactam, clindamycin, and metronidazole) between the first days of conditioning and days 21 post-allo-HCT.

AML – acute myeloid leukemia; CLL – chronic lymphocytic leukemia; MDS – myelodysplastic syndrome; ALL – acute lymphoblastic leukemia; MAC – myeloablative conditioning; RIC – reduced-intensity conditioning; NMA – nonmyeloablative conditioning; GVHD – graft-versus-host disease ; PB – peripheral blood; BM – bone marrow; MTX – methotrexate; MMF – mycophenolate mofetil; PTCy – post-transplantation cyclophosphamide

**Figure S2. Distribution and  $\alpha$ -diversity of stool sample over time from allogeneic hematopoietic cell transplantation.** Intestinal microbiota diversity, as measured by 16S sequencing and the inverse Simpson index, declines over time. A mean of 6.5 and 4.3 samples per patient were collected between days -20 to 30 and -10 to 10, respectively.

HCT – hematopoietic cell transplantation

**Figure S3. Incidence of bacterial monodomination over time.** Monodomination is defined as a relative-abundance threshold of any single ASV of at least 30%.<sup>(1)</sup>

HCT – hematopoietic cell transplantation

**Figure S4. Different modeling techniques demonstrate changes in similar taxa.** The bivariate analysis considering the effect of time and conditioning regimen (with random effects to account for repeated measures) was performed with several different differential abundance tools.<sup>(2-7)</sup> While there were fewer significant hits detected by Ancom, overall there was strong

agreement between the tools despite the different underlying statistical approaches used by each.

**Figure S5. Multivariate analysis of taxonomic responses to conditioning.** (A) MaAsLin2 model adjusting for time of sampling, conditioning regimens, antibiotic exposures, underlying disease, GVHD prophylaxis, and clinical features reveals a differential association between microbial taxa and conditioning regimens; samples were limited to those collected between day 0 and 12 post-transplant. Antibiotic exposure was encoded as the number of days between day -30 relative to transplant and sample collection when the patient received an antibiotic of the class. Notably, the microbial landscape is also strongly shaped by antibiotic exposures. In this analysis, the baseline for the conditioning exposures was set to the first sample on or after day 0. The strong associations with the aggregated "any" exposure to GVHD prophylaxis drugs prompted the following panel **Figure S5B** in which the GVHD prophylaxis drug exposures were encoded individually as pre/post exposure, per sample. **Figure S5C** shows the effects of both the antibiotic and the individual conditioning drug exposures in the conditioning window (day -10 to 0 relative to transplant). Conditioning regimen was encoded as the proportion of the drug course received at the time of sampling. This highlights the changes attributable to the conditioning individual drugs, with the caveat that there is a strong correlation structure among the drugs (i.e., the conditioning regimens).

GVHD – graft-versus-host disease; PPX – prophylaxis; ALL – acute lymphoblastic leukemia; AML – acute myeloid leukemia; CLL – chronic lymphocytic leukemia; MDS – myelodysplastic syndrome; MPN – myeloproliferative neoplasm; PBSC – peripheral blood stem cell; drt – time from allogeneic hematopoietic cell transplantation

**Figure S6. Correlation matrix between patient, disease, and transplantation features.**

Categorical data were one-hot recoded, and Pearson correlations were calculated. Purple indicates a negative correlation, green indicates a positive correlation; circles are drawn around significant associations (Benjamini Hochberg corrected  $p < .01$ ). Prefixes proph, abx, and cond refer to GVHD prophylaxis, antibiotic, and conditioning drugs, respectively.

## References

1. Taur Y, Xavier JB, Lipuma L, Ubeda C, Goldberg J, Gobourne A, *et al.* Intestinal domination and the risk of bacteremia in patients undergoing allogeneic hematopoietic stem cell transplantation. *Clinical infectious diseases* **2012**;55(7):905-14.
2. Martin BD, Witten D, Willis AD. Modeling microbial abundances and dysbiosis with beta-binomial regression. *The annals of applied statistics* **2020**;14(1):94.
3. Kaul A, Mandal S, Davidov O, Peddada SD. Analysis of microbiome data in the presence of excess zeros. *Frontiers in microbiology* **2017**;8:2114.
4. Lin H, Peddada SD. Analysis of compositions of microbiomes with bias correction. *Nature communications* **2020**;11(1):3514 doi 10.1038/s41467-020-17041-7.
5. Paulson JN, Stine OC, Bravo HC, Pop M. Differential abundance analysis for microbial marker-gene surveys. *Nature methods* **2013**;10(12):1200-2.
6. Paulson JN, Talukder H, Bravo HC. Longitudinal differential abundance analysis of microbial marker-gene surveys using smoothing splines. *BioRxiv* **2017**:099457.
7. Paulson JN, Pop M, Bravo HC. metagenomeSeq: Statistical analysis for sparse high-throughput sequencing. *Bioconductor package* **2013**(0):191.

Figure S1

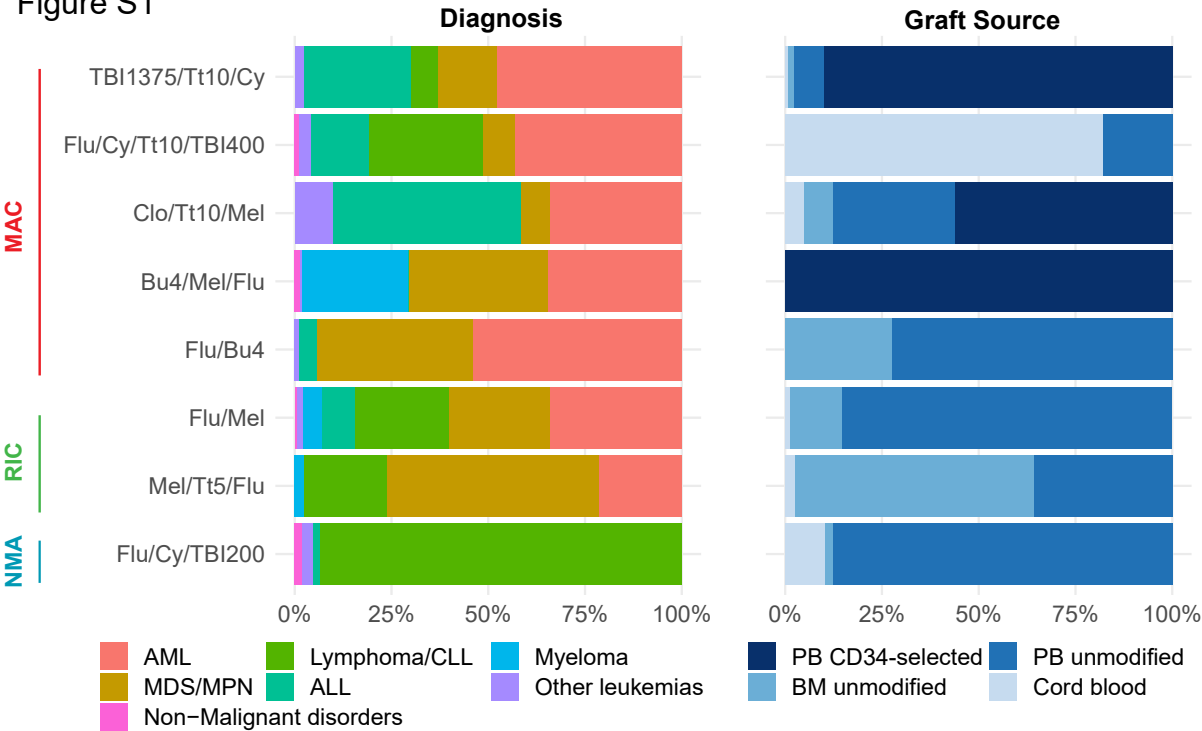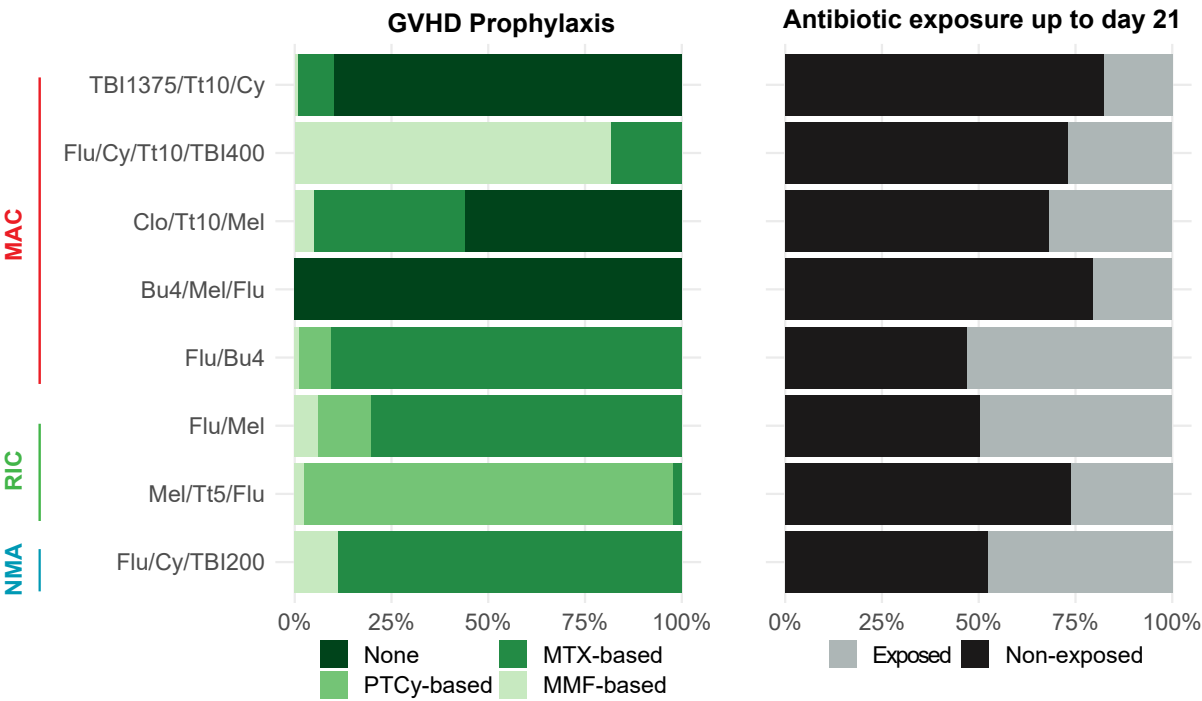

Figure S2

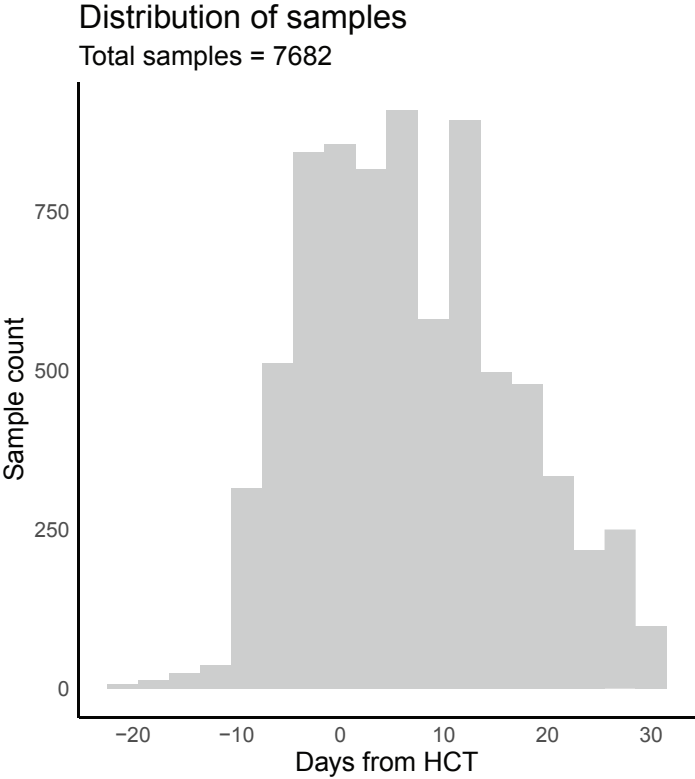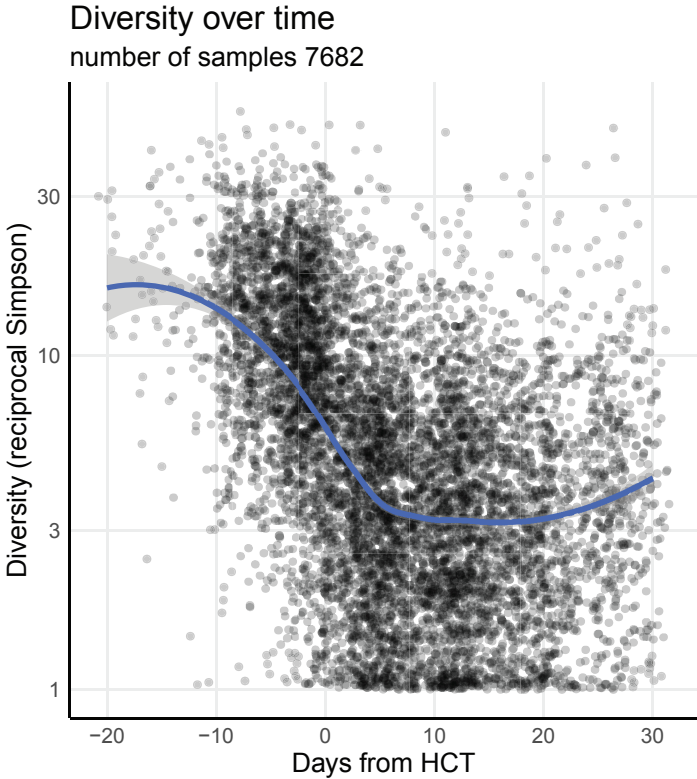

Figure S3

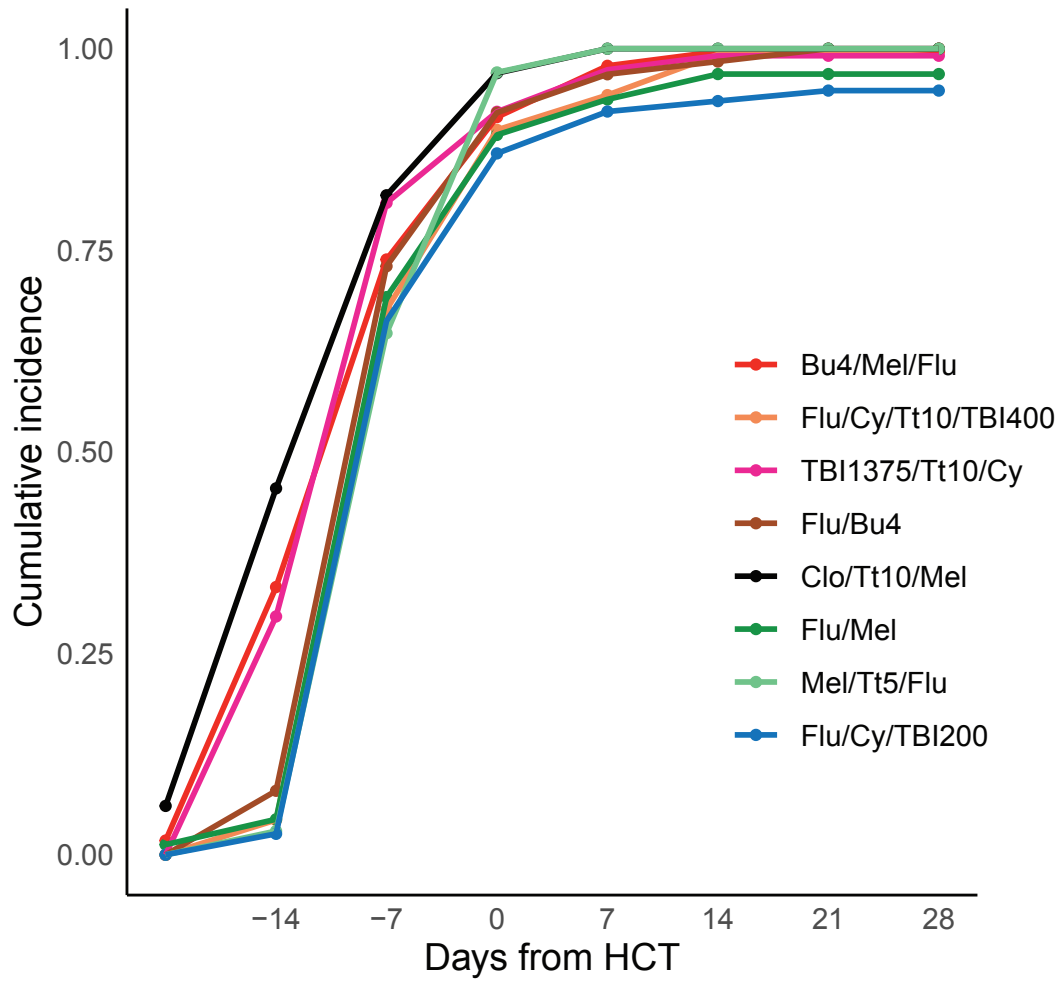

Figure S4

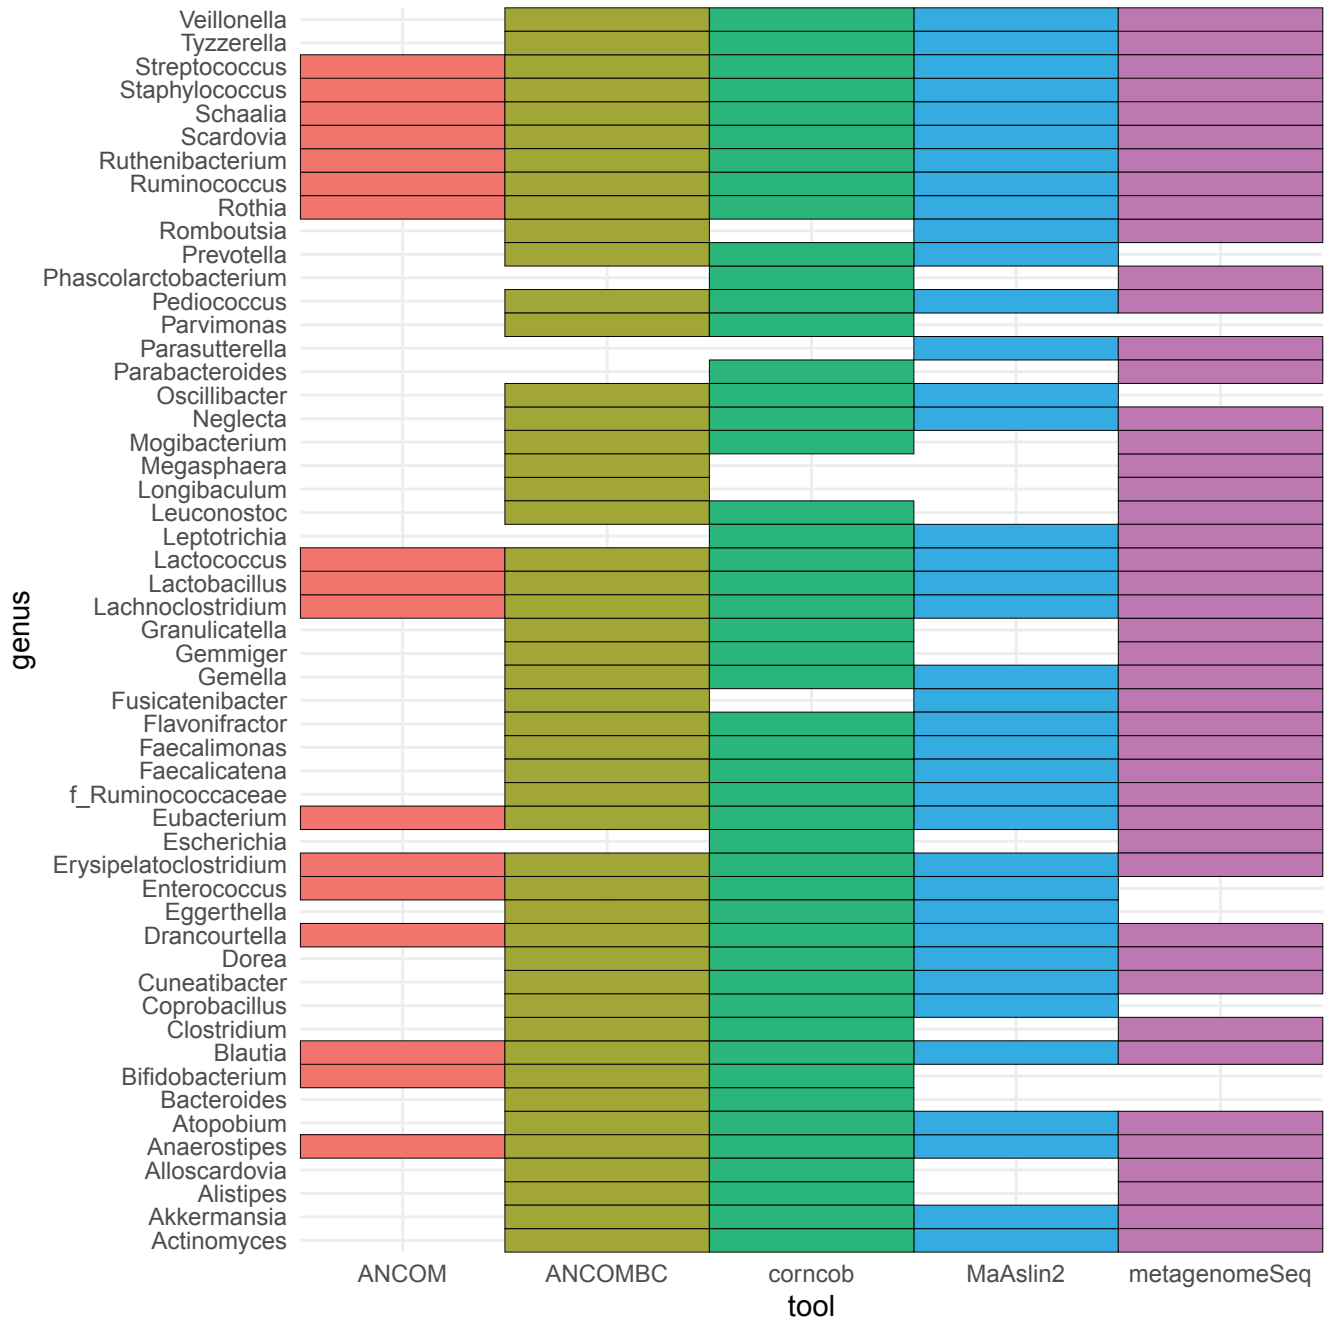



Figure S5A

784 patient transplants, 3390 samples  
 Excluded Antibiotic classes: abx\_aminoglycoside [2.55], abx\_antiparasitic [1.15], abx\_lincosamides [1.02],  
 abx\_lipopeptide [1.66], abx\_macrolide [3.06], abx\_penicillins [2.55], abx\_tetracycline [0.89]

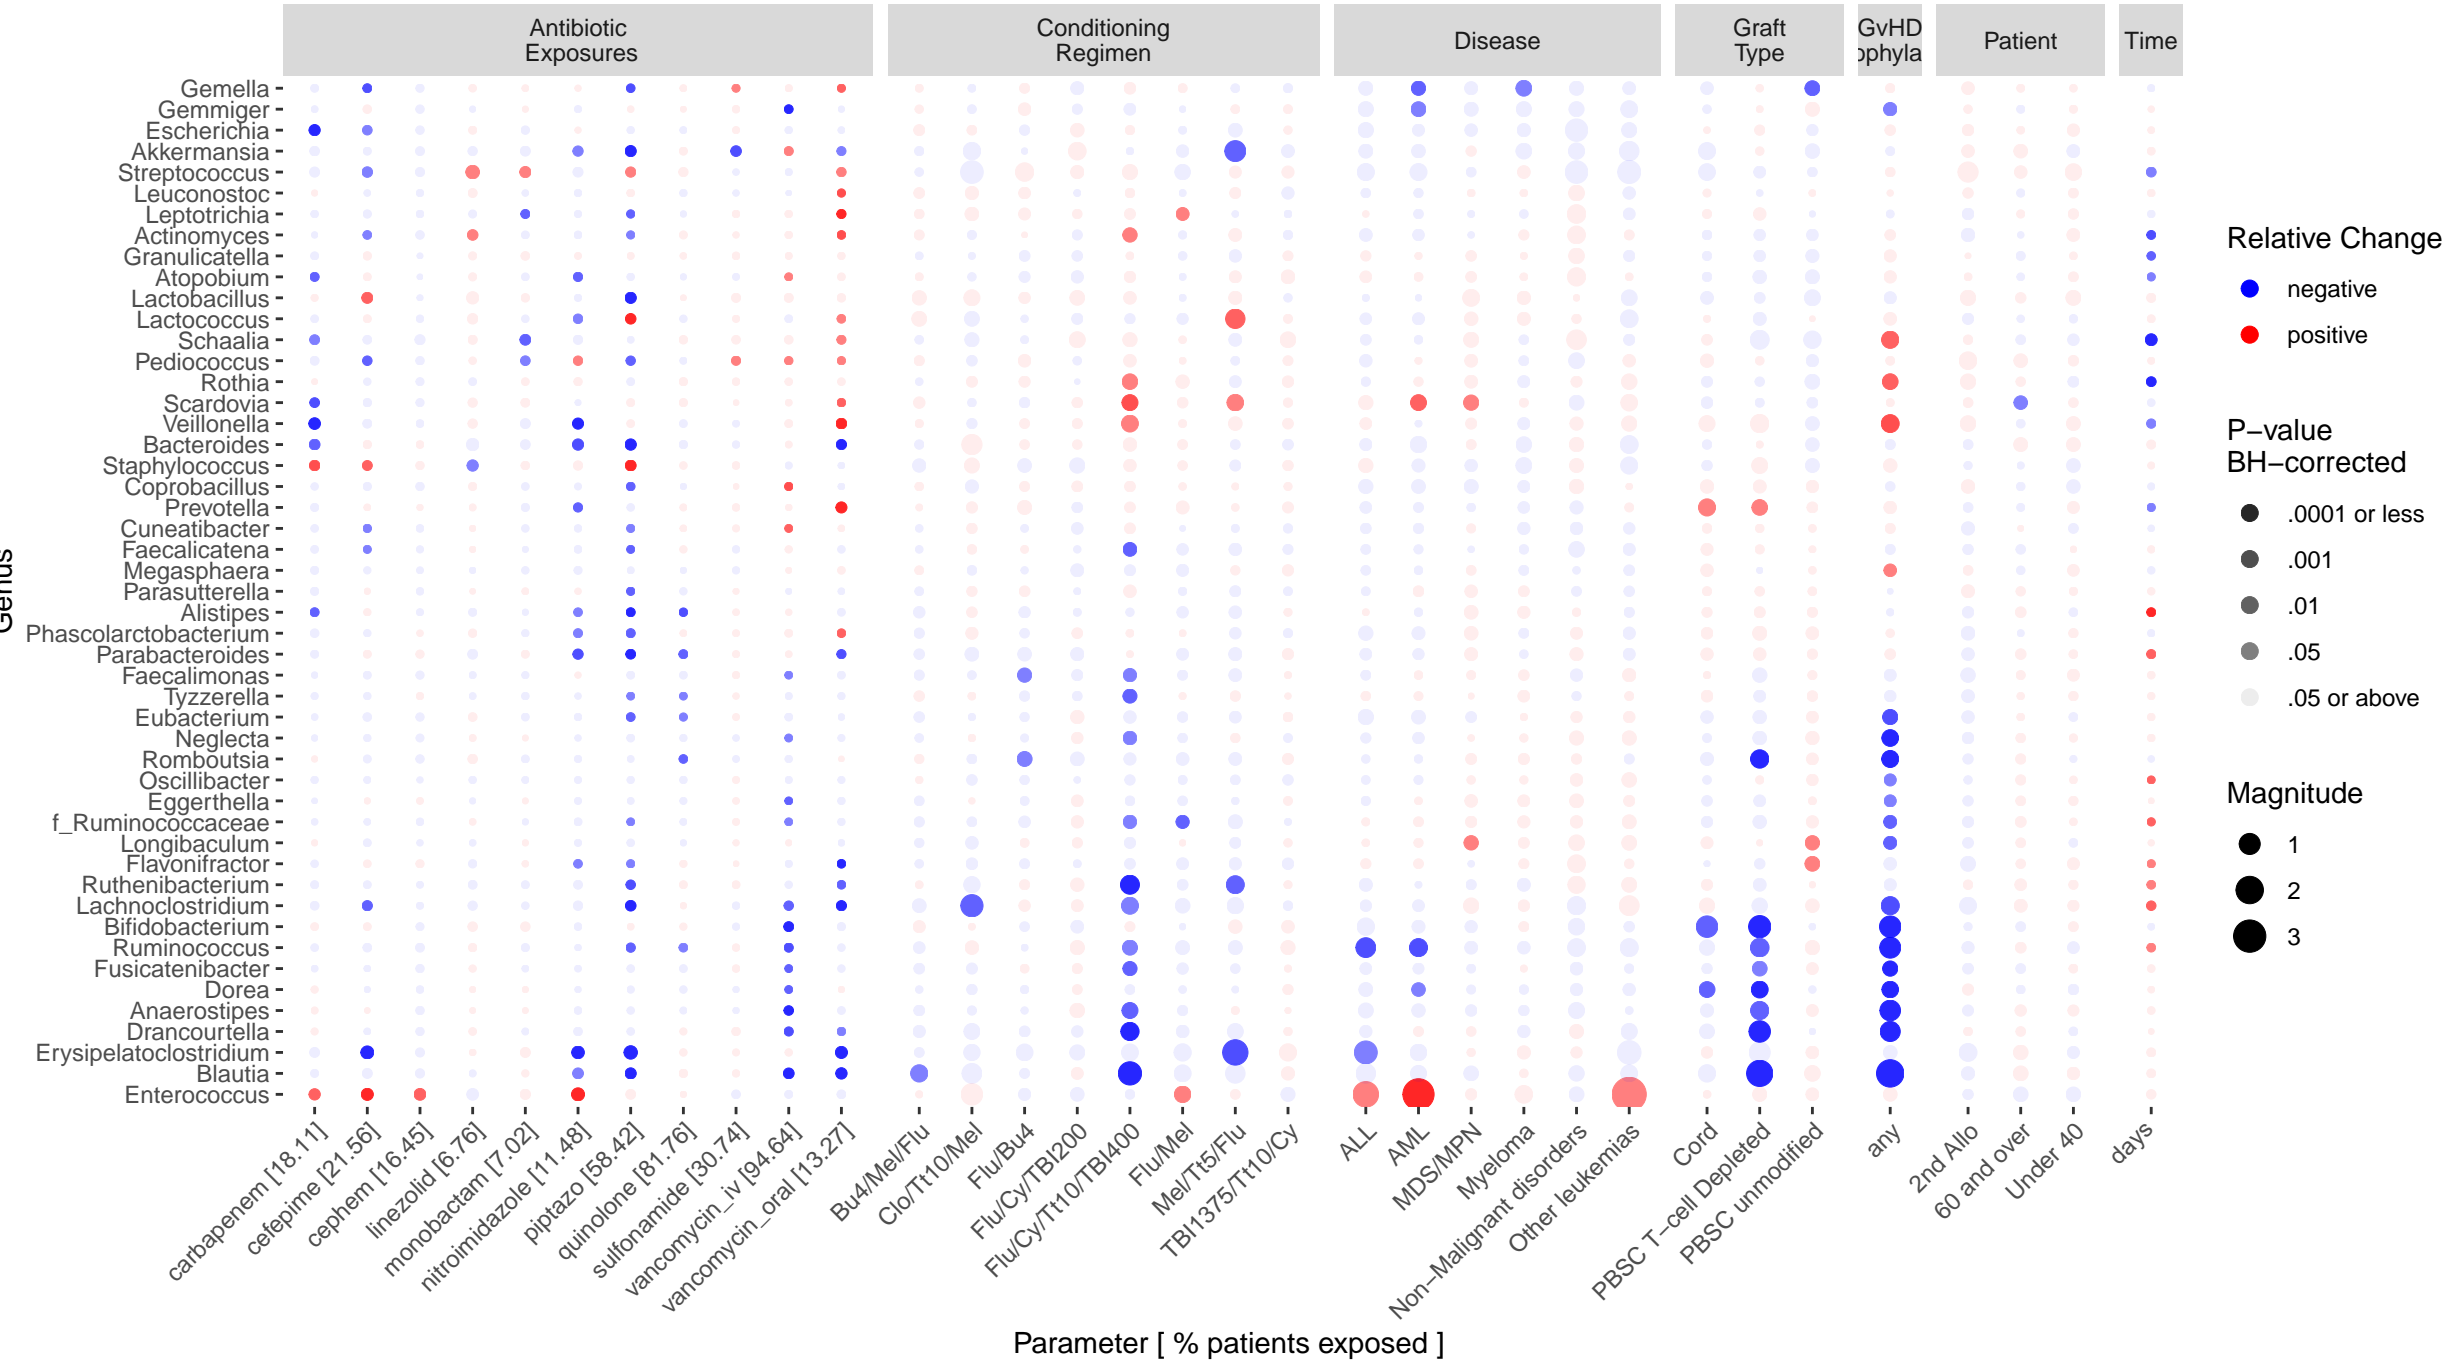

Disease is relative to Lymphoma/CLL;  
 Age is relative to 40–60 bracket, graft type is relative to BM.

Figure S5B

557 patient transplants, 1588 samples  
 Excluded Antibiotic classes: abx\_aminoglycoside [0.36], abx\_antiparasitic [1.26], abx\_carbapenem [1.44],  
 abx\_cefepime [4.13], abx\_lincosamides [0.54], abx\_lipopeptide [0.54], abx\_macrolide [1.97], abx\_monobactam [1.8], abx\_nitroimidazole [3.41],  
 abx\_oxazolidone [0.36], abx\_penicillins [1.44], abx\_tetracycline [0.18]

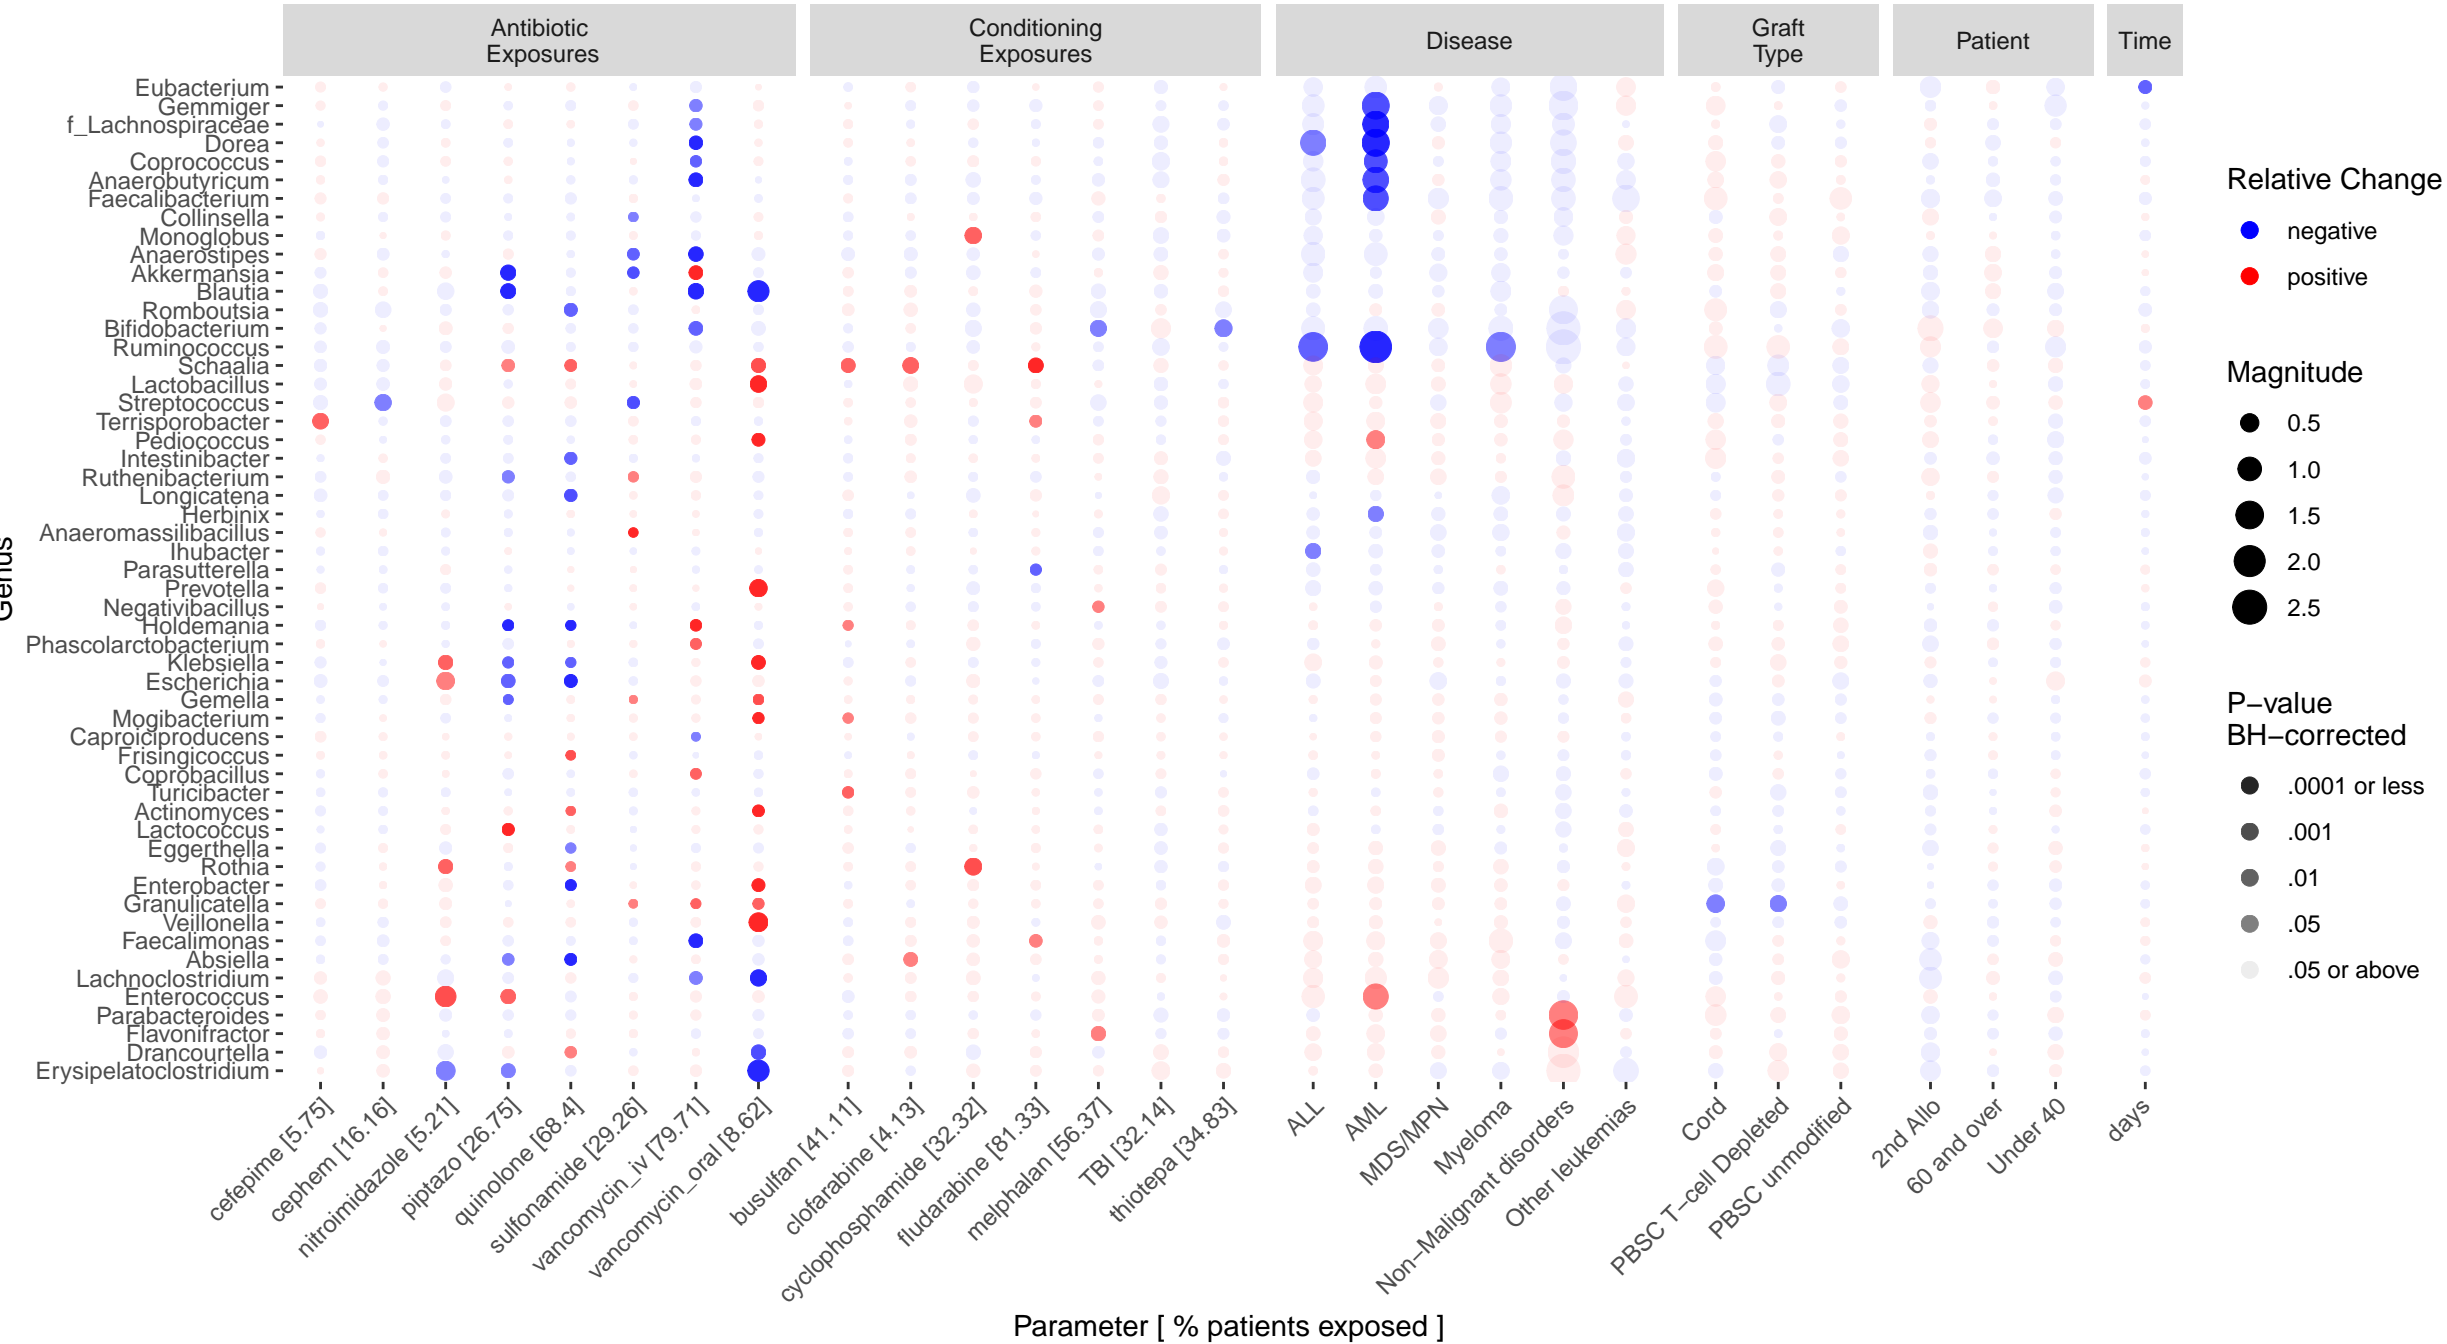

Disease is relative to Lymphoma/CLL;  
 Age is relative to 40–60 bracket, graft type is relative to BM.

784 patient transplants, 3390 samples  
 Excluded Antibiotic classes: abx\_aminoglycoside [2.55], abx\_antiparasitic [1.15], abx\_lincosamides [1.02],  
 abx\_lipopeptide [1.66], abx\_macrolide [3.06], abx\_penicillins [2.55], abx\_tetracycline [0.89]

Figure S5C

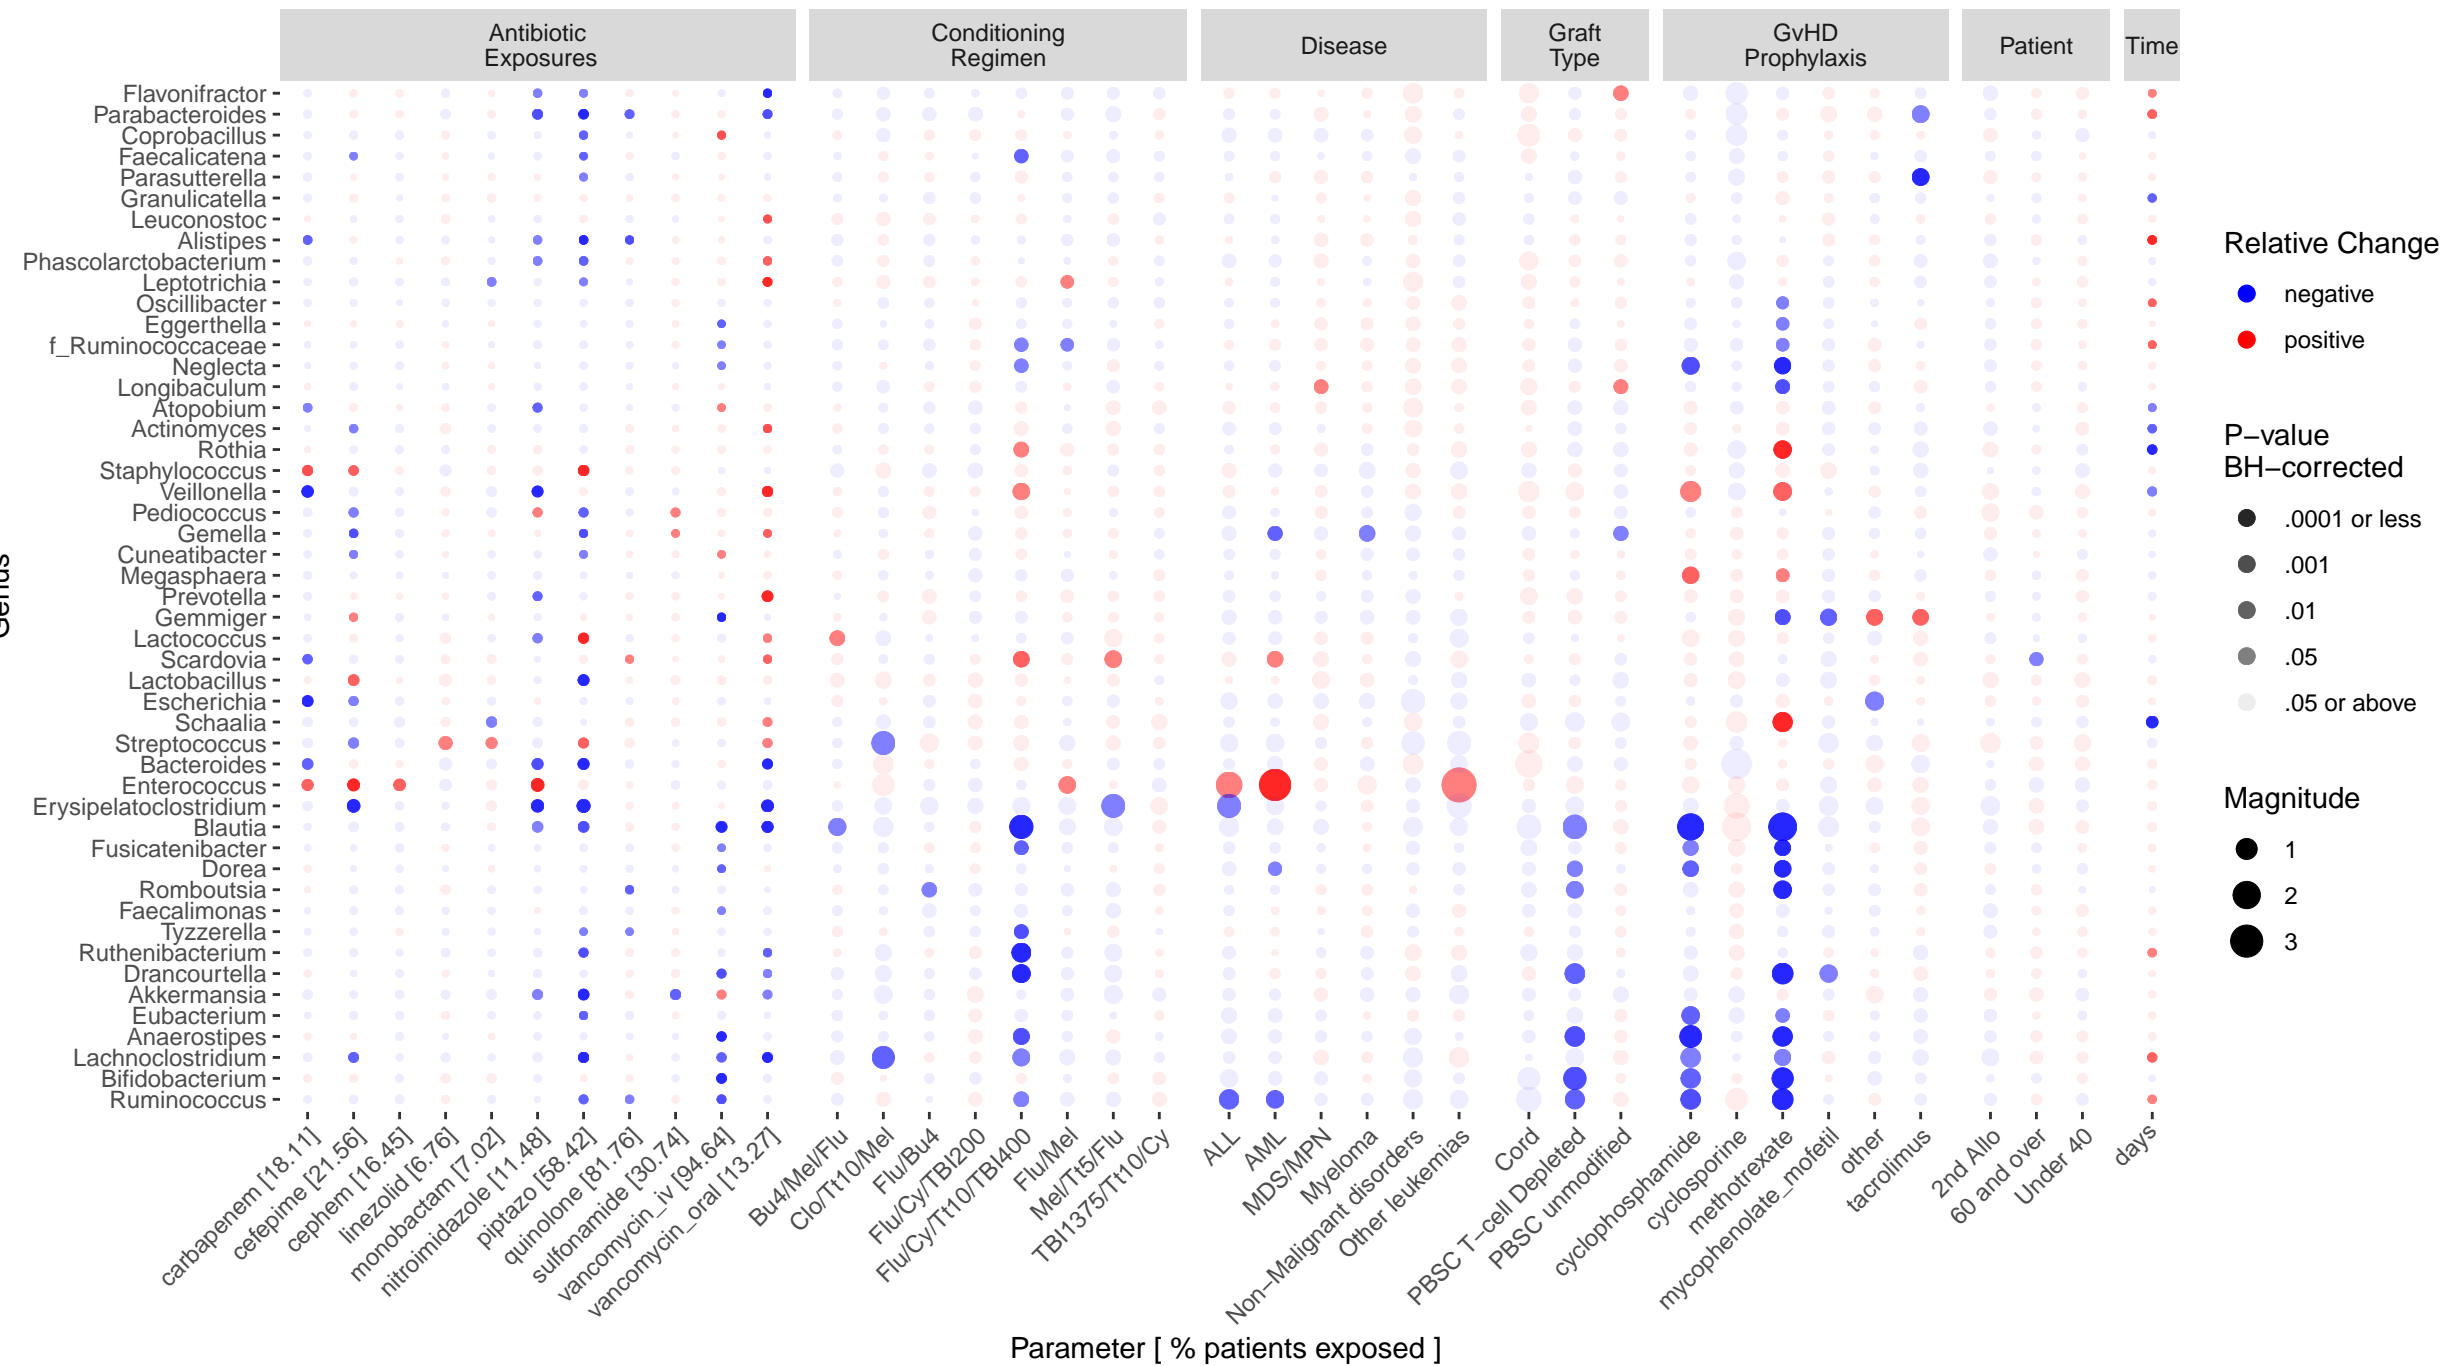

Disease is relative to Lymphoma/CLL;  
 Age is relative to 40–60 bracket, graft type is relative to BM.

Figure S6

BH-corrected  
p-value < .01

○ TRUE  
○ FALSE

Pearson  
Correlation

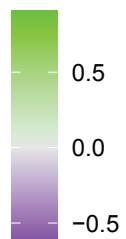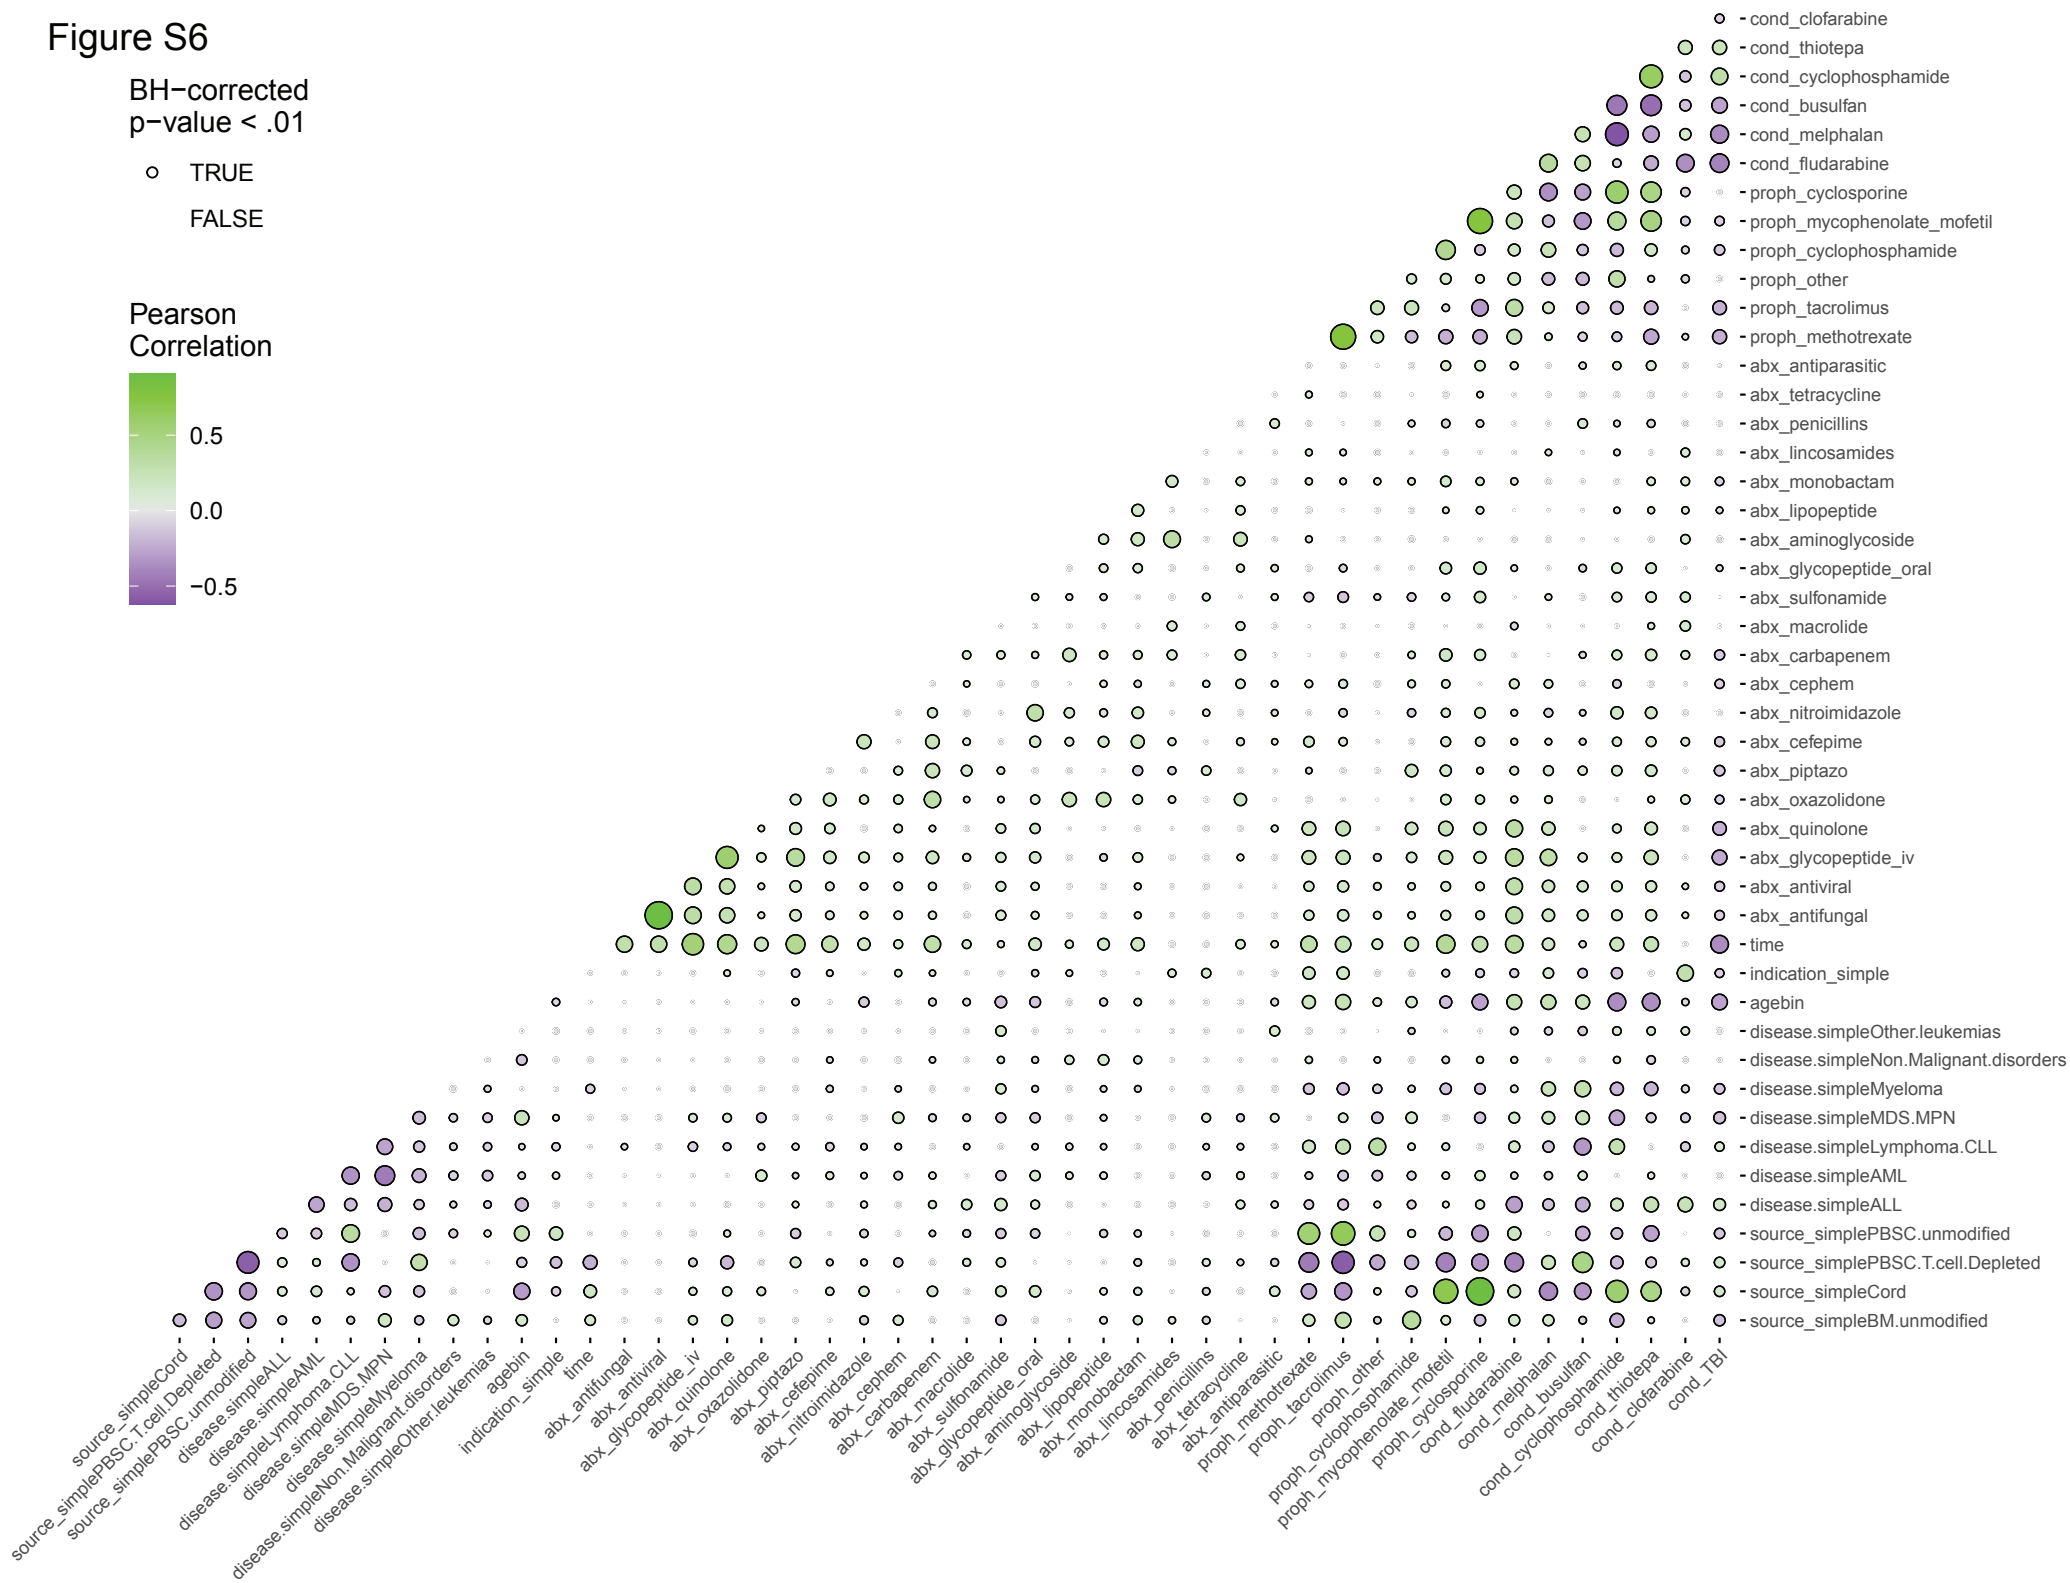

Supplement: NIHMS1848936-supplement-1.pdf [file NIHMS1848936-supplement-1.pdf]
